# Supplementary material for: Advanced glycation endproducts and dicarbonyls in end-stage renal disease: associations with uraemia and courses following renal replacement therapy
Source: PubMed Central journal article supplement — Clin Kidney J. 2019 Aug 28;13(5):855–66. doi: 10.1093/ckj/sfz099 (PMC7577778; doi:10.1093/ckj/sfz099), 2019-08-28
Supplement: sfz099_supplementary_material.pdf [file sfz099_supplementary_material.pdf]

## Online Supplemental Material

### **Advanced glycation endproducts and dicarbonyls in end-stage renal disease: associations with uremia and courses following renal replacement therapy**

Remy J.H. Martens<sup>a,b</sup>, Natascha J.H. Broers<sup>a,c</sup>, Bernard Canaud<sup>d,e</sup>; Maarten H. Christiaans<sup>a</sup>, Tom Cornelis<sup>f</sup>, Adelheid Gaulty<sup>d</sup>; Marc M.H. Hermans<sup>g</sup>, Constantijn J.A.M. Konings<sup>h</sup>, Frank M. van der Sande<sup>a</sup>, Jean L.J.M. Scheijen<sup>b,i</sup>, Frank Stiffij, Jeroen P. Kooman<sup>a,c</sup>, Casper G. Schalkwijk<sup>b,i</sup>

<sup>a</sup> Department of Internal Medicine, Division of Nephrology, Maastricht University Medical Center+, the Netherlands; <sup>b</sup> CARIM School for Cardiovascular Diseases, Maastricht University, Maastricht, the Netherlands; <sup>c</sup> NUTRIM School of Nutrition and Translational Research in Metabolism, Maastricht University, Maastricht, the Netherlands; <sup>d</sup> Medical Office EMEA, Fresenius Medical Care Deutschland GmbH, Bad Homburg, Germany; <sup>e</sup> Montpellier University, Montpellier, France; <sup>f</sup> Department of Nephrology, Jessa Hospital, Hasselt, Belgium; <sup>g</sup> Department of Internal Medicine, Division of Nephrology, Viecuri Medical Center, Venlo, the Netherlands; <sup>h</sup> Department of Internal Medicine, Division of Nephrology, Catharina Hospital Eindhoven, Eindhoven, the Netherlands; <sup>i</sup> Department of Internal Medicine, Maastricht University Medical Center+, Maastricht, the Netherlands; <sup>j</sup> Department of Internal Medicine, Division of Nephrology, Zuyderland Medical Center, Sittard-Geleen, the Netherlands.

## Table of contents

| <b>Supplemental Material</b>                                                                                                                                                                                               | <b>Page</b> |
|----------------------------------------------------------------------------------------------------------------------------------------------------------------------------------------------------------------------------|-------------|
| Supplementary Methods: in- and exclusion criteria for the individual studies                                                                                                                                               | 4           |
| Supplementary Methods: dialysis therapy modalities                                                                                                                                                                         | 6           |
| Supplementary Methods: study measurements                                                                                                                                                                                  | 8           |
| Table S1. Courses of (residual) kidney function over time in incident dialysis patients and kidney transplant recipients                                                                                                   | 10          |
| Table S2. Courses of body mass index, lean tissue index and fat tissue index over time in incident dialysis patients and kidney transplant recipients                                                                      | 11          |
| Table S3. Associations of end-stage renal disease with advanced glycation endproducts and dicarbonyls based on linear mixed models                                                                                         | 12          |
| Table S4. Associations of end-stage renal disease with advanced glycation endproducts and dicarbonyls with additional adjustment for current smoking                                                                       | 13          |
| Table S5. Association of estimated glomerular filtration rate (eGFR <sub>CKD-EPI</sub> ) with advanced glycation endproducts and dicarbonyls in controls and participants with chronic kidney disease stage 5 non-dialysis | 14          |
| Table S6. Association of estimated residual glomerular filtration rate (eGFR <sub>residual</sub> ) with advanced glycation endproducts and dicarbonyls in participants with chronic kidney disease stage 5 dialysis        | 15          |
| Table S7. Association of residual urine output with advanced glycation endproducts and dicarbonyls in participants with chronic kidney disease stage 5 dialysis                                                            | 16          |
| Table S8. Association of dialysis vintage with advanced glycation endproducts and dicarbonyls in participants with chronic kidney disease stage 5 dialysis                                                                 | 17          |
| Table S9. Cross-sectional comparison of participants on hemodialysis and peritoneal dialysis                                                                                                                               | 18          |
| Table S10. Course of advanced glycation endproducts and dicarbonyls stratified by dialysis modality                                                                                                                        | 19          |
| Table S11. Course of advanced glycation endproducts and dicarbonyls                                                                                                                                                        | 20          |

|                                                                                                                                                                            |    |
|----------------------------------------------------------------------------------------------------------------------------------------------------------------------------|----|
| stratified by dialysis modality with additional adjustment for estimated residual glomerular filtration rate                                                               |    |
| Table S12. Course of advanced glycation endproducts and dicarbonyls stratified by dialysis modality with additional adjustment for serum $\beta$ 2-microglobulin           | 21 |
| Figure S1. Flowchart depicting the derivation of the cross-sectional and longitudinal study populations                                                                    | 22 |
| Figure S2. Correlation matrices between advanced glycation endproducts and dicarbonyls stratified by participant group                                                     | 24 |
| Figure S3. Boxplots of serum advanced glycation endproducts, dicarbonyls and skin autofluorescence over time in incident dialysis patients stratified by dialysis modality | 27 |

## Supplementary Methods

### *In- and exclusion criteria of the individual studies*

Incident dialysis patients were individuals with ESRD who would start with dialysis within one month. Measurements were performed maximum four weeks prior to the first dialysis session. Exclusion criteria for incident dialysis patients were: acute start of dialysis treatment, active symptomatic coronary artery disease or cardiac failure New York Heart Association (NYHA) class III or IV, active malignancies, active infections, and inability to provide informed consent. Incident dialysis patients were recruited from the following dialysis centers in the South East of the Netherlands: Maastricht University Medical Center+ Maastricht, Catharina Hospital Eindhoven, Viecuri Hospital Venlo, Zuyderland Medical Centre Sittard, and St. Laurentius Hospital Roermond (Ethical Committee study number NL33129.068.10).

Kidney transplant recipients were individuals with ESRD receiving a living donor kidney transplant, age  $\geq 18$  years, and ability to provide informed consent. These individuals were recruited from the pre-transplantation clinic at the Maastricht University Medical Center+ in the Netherlands (Ethical Committee study number NL43381.068.13). Baseline measurements were performed within five days before kidney transplantation, with the exception of one patient who was examined five weeks before kidney transplantation.

Prevalent dialysis patients participated in the Uremic Toxins, Cardiovascular Effects and Physical Activity in Intensive Hemodialysis (INTHEMO) study, an international multicenter study which has been performed in the southern part of the Netherlands (Maastricht University Medical Center+ and Zuyderland Heerlen Dialysis Unit), Belgium (Jessa Hospital Hasselt Dialysis Unit), and the United Kingdom (Manchester

University NHS Foundation Trust). For the present study, only participants from the Netherlands (Ethical Committee study number NL35039.068.10) were included to improve comparability with the incident dialysis patients, kidney transplant recipients and healthy controls. Prevalent dialysis patients were  $\geq 18$  years and treated with hemodialysis (HD) or peritoneal dialysis (PD) treatment for at least six months. Exclusion criteria for the prevalent dialysis patients were similar to those of incident dialysis patients, with the addition of chronic antibiotic use and colectomy.

Healthy donors were individuals who were suitable for living renal donation, for example, no uncontrolled or severe hypertension, and/or diabetes mellitus, and able to provide informed consent. These individuals were recruited from the pre-transplantation clinic at the Maastricht University Medical Center+ in the Netherlands. Baseline measurements were performed within one month before donation.

Healthy controls were non-diabetic, non-smokers, not hypertensive (systolic blood pressure  $< 170$  mmHg and/or diastolic blood pressure  $< 100$  mmHg), and able to provide informed consent, and were recruited via advertisements at the university hospital.

### ***Dialysis therapy modalities***

Detailed data on renal replacement therapy modalities were collected retrospectively and could be retrieved for 16 incident HD patients, 16 incident PD patients, 17 prevalent HD patients and 14 prevalent PD patients.

In both incident and prevalent HD patients, dialysis was performed three times per week for about four hours, using ultrapure dialysates and mostly high-flux dialyzers with synthetic membranes (polysulfone membranes (from Fresenius Medical Care GmbH, Bad Homburg, Germany) in 7 incident HD patients and 11 prevalent HD patients; polyethersulfone membrane (from Nipro, Osaka, Japan) in 5 incident HD patients and 3 prevalent HD patients; polyarylethersulfone/ polyvinylpyrrolidone/ polyamide blend membranes (Gambro, Lund, Sweden) in 2 incident HD patient). In addition, 2 incident HD patients and 3 prevalent HD patients were on low-flux dialyzers with synthetic membranes (polyarylethersulfone/ polyvinylpyrrolidone/ polyamide blend membranes (Gambro) and polysulfone membranes (Fresenius Medical Care), respectively). No patients were treated with hemodiafiltration. Vascular access was via an arteriovenous shunt in 18 incident HD patients and all prevalent HD patients. Three incident HD patients had a central venous catheter (1 of these patients had switched to an arteriovenous shunt after 6 months of follow-up).

In both incident and prevalent PD patients, only PD fluids with low glucose-derived degradation product (GDP) content were used (Physioneal<sup>®</sup>, Extraneal<sup>®</sup>, and Nutrineal<sup>®</sup> from Baxter, Castlebar, Ireland). The glucose concentration was prescribed at the discretion of the treating physician.

During follow-up, three patients changed dialysis modality: 1 from PD to HD from 6 months after dialysis-initiation onwards (first via a central venous catheter, later via

an arteriovenous shunt), 1 from PD to HD at 12 months after dialysis initiation (via a central venous catheter), and 1 from HD to PD at 12 months after dialysis initiation.

## ***Study measurements***

### *Other laboratory measurements*

Dialysis adequacy (Kt/V) was retrospectively collected from the electronic medical health record (single-pool Kt/V for HD, weekly Kt/V for PD). In addition, serum creatinine and serum  $\beta$ 2-microglobulin were measured with routine laboratory measurements at the time of study participation, except for healthy kidney donors and kidney transplant recipients, for whom these data were retrospectively collected from the health record. In controls and in participants with CKD5-ND, estimated GFR was calculated with the CKD-EPI equation based on serum creatinine (eGFR<sub>CKD-EPI</sub>).<sup>1</sup> In participants with CKD5-D, residual GFR was estimated with an equation based on serum  $\beta$ 2-microglobulin (eGFR<sub>residual</sub>).<sup>2</sup>

### *Clinical characteristics*

Origin of renal disease was based on the diagnosis as reported in the patient's electronic medical health record and categorized as nephrosclerosis, glomerulosclerosis, hypertensive nephropathy, renovascular disease, diabetic nephropathy, polycystic kidney disease, IgA nephropathy, glomerulonephritis, other, and unknown. History of diabetes mellitus and cardiovascular disease, and medication use were based on self-report (for healthy controls) and the health record (for patients). Current smoking was based on self-report. Current dialysis modality, history of kidney transplantation, dialysis vintage and residual urine output were collected from the health record. Body mass index was calculated as weight divided by height squared. Lean tissue index and fat tissue index were calculated as lean tissue mass and adipose tissue mass divided by height squared, respectively. For this purpose, lean tissue mass and adipose tissue mass were determined by



bioimpedance spectroscopy with the Body Composition Monitor (BCM<sup>®</sup>, Fresenius Medical Care GmbH, Bad Homburg, Germany), which uses a three compartment model (adipose tissue mass, lean tissue mass, and fluid overload).<sup>3</sup> Office blood pressure was measured with an electronic sphygmomanometer (Omron M4-I, Omron, Japan).

## References

1. Levey AS, Stevens LA, Schmid CH, Zhang YL, Castro AF, 3rd, Feldman HI, Kusek JW, Eggers P, Van Lente F, Greene T, Coresh J, Ckd EPI: A new equation to estimate glomerular filtration rate. *Ann Intern Med*, 150: 604-612, 2009
2. Shafi T, Michels WM, Levey AS, Inker LA, Dekker FW, Krediet RT, Hoekstra T, Schwartz GJ, Eckfeldt JH, Coresh J: Estimating residual kidney function in dialysis patients without urine collection. *Kidney Int*, 89: 1099-1110, 2016
3. Chamney PW, Wabel P, Moissl UM, Muller MJ, Bosy-Westphal A, Korth O, Fuller NJ: A whole-body model to distinguish excess fluid from the hydration of major body tissues. *Am J Clin Nutr*, 85: 80-89, 2007

## Supplementary Tables

Table S1. Courses of (residual) kidney function over time in incident dialysis patients and kidney transplant recipients

| Dialysis (overall)*                                   | Time since dialysis initiation (months)    |                     |                     |                     |
|-------------------------------------------------------|--------------------------------------------|---------------------|---------------------|---------------------|
| Biomarkers                                            | Baseline                                   | 1                   | 6                   | 12                  |
| Serum creatinine ( $\mu\text{mol/L}$ )                | 585.5 [431.0-777.5]                        | 524.0 [390.0-648.8] | 613.0 [473.5-791.5] | 688.0 [548.0-817.0] |
| $\beta$ 2-microglobulin (mg/L)                        | 9.9 [7.2-11.9]                             | 9.5 [8.2-13.2]      | 11.6 [9.0-17.9]     | 13.2 [9.3-23.1]     |
| eGFR <sub>CKD-EPI</sub> (mL/min/1.73m <sup>2</sup> )  | 8.1 $\pm$ 2.8                              | NA                  | NA                  | NA                  |
| eGFR <sub>residual</sub> (mL/min/1.73m <sup>2</sup> ) | 17.6 [10.8-29.8]                           | 16.1 [8.9-26.5]     | 11.8 [3.8-18.9]     | 8.3 [2.3-16.2]      |
|                                                       |                                            |                     |                     |                     |
| Hemodialysis*                                         | Time since dialysis initiation (months)    |                     |                     |                     |
| Biomarkers                                            | Baseline                                   | 1                   | 6                   | 12                  |
| Serum creatinine ( $\mu\text{mol/L}$ )                | 598.0 [454.0-804.0]                        | 527.5 [419.8-704.8] | 660.5 [575.5-897.5] | 699.5 [578.8-975.3] |
| Serum $\beta$ 2-microglobulin (mg/L)                  | 10.0 [7.3-12.5]                            | 10.2 [8.6-12.8]     | 16.7 [10.8-21.9]    | 17.1 [11.1-13.2]    |
| eGFR <sub>CKD-EPI</sub> (mL/min/1.73m <sup>2</sup> )  | 7.6 $\pm$ 2.6                              | NA                  | NA                  | NA                  |
| eGFR <sub>residual</sub> (mL/min/1.73m <sup>2</sup> ) | 17.5 [10.1-32.2]                           | 14.7 [8.0-22.0]     | 5.0 [2.7-12.9]      | 5.3 [0.9-9.0]       |
|                                                       |                                            |                     |                     |                     |
| Peritoneal dialysis*                                  | Time since dialysis initiation (months)    |                     |                     |                     |
| Biomarkers                                            | Baseline                                   | 1                   | 6                   | 12                  |
| Serum creatinine ( $\mu\text{mol/L}$ )                | 540.0 [423.0-710.0]                        | 520.0 [354.8-611.3] | 544.0 [385.0-712.0] | 598.0 [432.5-783.5] |
| Serum $\beta$ 2-microglobulin (mg/L)                  | 9.9 [7.0-11.5]                             | 8.7 [7.0-13.2]      | 8.9 [7.8-12.7]      | 10.9 [8.5-16.1]     |
| eGFR <sub>CKD-EPI</sub> (mL/min/1.73m <sup>2</sup> )  | 8.7 $\pm$ 2.9                              | NA                  | NA                  | NA                  |
| eGFR <sub>residual</sub> (mL/min/1.73m <sup>2</sup> ) | 17.8 [11.0-28.7]                           | 17.0 [9.0-37.8]     | 16.4 [9.8-23.9]     | 13.6 [4.4-20.9]     |
|                                                       |                                            |                     |                     |                     |
| Kidney transplant recipients**                        | Time since kidney transplantation (months) |                     |                     |                     |
| Biomarkers                                            | Baseline                                   | 3                   | 6                   | 12                  |
| Serum creatinine ( $\mu\text{mol/L}$ )                | 519.0 [431.0-777.5]                        | 129.0 [110.5-156.5] | 121.5 [107.0-138.0] | 119.5 [101.8-138.5] |
| eGFR <sub>CKD-EPI</sub> (mL/min/1.73m <sup>2</sup> )  | 8.7 $\pm$ 3.6                              | 48.1 $\pm$ 10.4     | 51.7 $\pm$ 9.6      | 52.7 $\pm$ 9.7      |

Data are presented as n (%), mean  $\pm$  standard deviation, or median [25<sup>th</sup> percentile - 75<sup>th</sup> percentile].

Abbreviations: eGFR<sub>CKD-EPI</sub>, estimated glomerular filtration rate based on the creatinine CKD-EPI equation; eGFR<sub>residual</sub>, estimated residual GFR based on  $\beta$ 2-microglobulin; NA, not applicable.

\* For participants on hemodialysis/peritoneal dialysis, analyses are based on n = 19/17, n = 20/16, n = 18/15, n = 14/13 at baseline, 1 month, 6 months and 12 months after dialysis initiation, respectively.

\*\* For kidney transplant recipients, analyses are based on analyses are based on n = 21, n = 17, n = 18, n = 18 at baseline months, 1 month, 6 months and 12 months after kidney transplantation, respectively.

Table S2. Courses of body mass index, lean tissue index and fat tissue index over time in incident dialysis patients and kidney transplant recipients

| Dialysis (overall)*            | Time since dialysis initiation (months)    |           |           |           |
|--------------------------------|--------------------------------------------|-----------|-----------|-----------|
| Body weight measures           | Baseline                                   | 1         | 6         | 12        |
| BMI (kg/m <sup>2</sup> )       | 25.7 ±3.8                                  | 25.7 ±6.3 | 25.6 ±3.7 | 25.7±3.5  |
| LTI (kg/m <sup>2</sup> )       | 14.5 ±2.5                                  | 14.4 ±2.2 | 14.2 ±2.0 | 14.5 ±2.3 |
| FTI (kg/m <sup>2</sup> )       | 10.5 ±3.9                                  | 10.5 ±4.1 | 10.7 ±4.4 | 10.8 ±3.7 |
|                                |                                            |           |           |           |
| Hemodialysis*                  | Time since dialysis initiation (months)    |           |           |           |
| Body weight measures           | Baseline                                   | 1         | 6         | 12        |
| BMI (kg/m <sup>2</sup> )       | 27.0 ±3.7                                  | 26.8 ±3.7 | 26.6 ±4.0 | 26.8 ±3.3 |
| LTI (kg/m <sup>2</sup> )       | 14.7 ±2.3                                  | 14.5 ±2.1 | 14.0 ±1.7 | 14.5 ±2.3 |
| FTI (kg/m <sup>2</sup> )       | 11.5 ±3.6                                  | 11.3 ±4.5 | 11.8 ±4.5 | 11.9 ±3.3 |
|                                |                                            |           |           |           |
| Peritoneal dialysis*           | Time since dialysis initiation (months)    |           |           |           |
| Body weight measures           | Baseline                                   | 1         | 6         | 12        |
| BMI (kg/m <sup>2</sup> )       | 24.5 ±3.4                                  | 24.7 ±3.4 | 24.7 ±3.2 | 24.7 ±3.5 |
| LTI (kg/m <sup>2</sup> )       | 14.4 ±2.7                                  | 14.4 ±2.3 | 14.3 ±2.3 | 14.5 ±2.4 |
| FTI (kg/m <sup>2</sup> )       | 9.6 ±4.0                                   | 9.7 ±3.6  | 9.8 ±4.2  | 9.9 ±3.9  |
|                                |                                            |           |           |           |
| Kidney transplant recipients** | Time since kidney transplantation (months) |           |           |           |
| Body weight measures           | Baseline                                   | 3         | 6         | 12        |
| BMI (kg/m <sup>2</sup> )       | 24.5 ± 4.5                                 | 24.1 ±4.3 | 24.6 ±4.1 | 25.4 ±4.8 |
| LTI (kg/m <sup>2</sup> )       | 14.4 ±3.1                                  | 14.3 ±2.6 | 14.2 ±2.0 | 14.9 ±3.0 |
| FTI (kg/m <sup>2</sup> )       | 9.9 ±4.3                                   | 9.4 ±4.3  | 10.3 ±3.8 | 10.1 ±5.1 |

Data are presented as % or mean ± standard deviation.

Abbreviations: BMI, body mass index; FTI, fat tissue index; LTI, lean tissue index.

\* For participants on hemodialysis/peritoneal dialysis, analyses are based on n = 21/22, n = 21/22, n = 20/21, n = 18/19 at baseline, 1 month, 6 months and 12 months after dialysis initiation, respectively, for BMI, and n = 19/22, n = 20/22, n = 19/21, n = 17/19, respectively, for LTI and FTI.

\*\* For kidney transplant recipients, analyses are based on analyses are based on n = 21, n = 17, n = 18, n = 18 at baseline, 1 month, 6 months and 12 months after kidney transplantation, respectively, for BMI, and n = 21, n = 16, n = 16, n = 17, respectively, for LTI and FTI.

Table S3. Associations of end-stage renal disease with advanced glycation endproducts and dicarbonyls based on linear mixed models

| Biomarker                      | Model | CKD5-ND vs. controls* |         | CKD5-D vs. controls* |         | CKD5-D vs. CKD5-ND* |         |
|--------------------------------|-------|-----------------------|---------|----------------------|---------|---------------------|---------|
|                                |       | Ratio (95%CI)         | P value | Ratio (95%CI)        | P value | Ratio (95%CI)       | P value |
| CML <sub>free</sub>            | 1     | 6.13 (3.33; 11.27)    | < 0.001 | 15.89 (8.60; 29.36)  | < 0.001 | 2.59 (1.67; 4.02)   | < 0.001 |
|                                | 2     | 5.99 (3.18; 11.28)    | < 0.001 | 15.81 (8.31; 30.09)  | < 0.001 | 2.64 (1.68; 4.14)   | < 0.001 |
| CML <sub>protein-bound</sub>   | 1     | 2.50 (2.19; 2.86)     | < 0.001 | 3.14 (2.71; 3.64)    | < 0.001 | 1.26 (1.09; 1.45)   | 0.002   |
|                                | 2     | Does not converge     |         | Does not converge    |         | Does not converge   |         |
| CEL <sub>free</sub>            | 1     | 5.86 (2.63; 13.06)    | < 0.001 | 20.17 (9.01; 45.14)  | < 0.001 | 3.44 (2.10; 5.62)   | < 0.001 |
|                                | 2     | 5.73 (2.53; 12.97)    | < 0.001 | 19.69 (8.62; 44.99)  | < 0.001 | 3.44 (2.08; 5.67)   | < 0.001 |
| CEL <sub>protein-bound</sub>   | 1     | Does not converge     |         | Does not converge    |         | Does not converge   |         |
|                                | 2     | Does not converge     |         | Does not converge    |         | Does not converge   |         |
| MG-H1 <sub>free</sub>          | 1     | 8.51 (4.83; 14.99)    | < 0.001 | 17.96 (10.11; 31.93) | < 0.001 | 2.11 (1.92; 3.45)   | 0.003   |
|                                | 2     | 8.40 (4.69; 15.03)    | < 0.001 | 17.76 (9.74; 32.40)  | < 0.001 | 2.12 (1.28; 3.51)   | 0.005   |
| MG-H1 <sub>protein-bound</sub> | 1     | 1.63 (1.43; 1.85)     | < 0.001 | 1.71 (1.48; 1.96)    | < 0.001 | 1.05 (0.91; 1.20)   | 0.505   |
|                                | 2     | 1.64 (1.43; 1.87)     | < 0.001 | 1.72 (1.48; 2.01)    | < 0.001 | 1.05 (0.91; 1.22)   | 0.471   |
| GO                             | 1     | 1.92 (1.16; 3.15)     | 0.011   | 3.76 (2.28; 6.21)    | < 0.001 | 1.96 (1.42; 2.72)   | < 0.001 |
|                                | 2     | 1.87 (1.18; 2.97)     | 0.008   | 3.34 (2.09; 5.35)    | < 0.001 | 1.79 (1.30; 2.46)   | < 0.001 |
| MGO                            | 1     | 2.39 (1.52; 3.73)     | < 0.001 | 4.08 (2.61; 6.40)    | < 0.001 | 1.71 (1.28; 2.28)   | < 0.001 |
|                                | 2     | 2.32 (1.45; 3.70)     | < 0.001 | 3.99 (2.48; 6.40)    | < 0.001 | 1.72 (1.28; 2.31)   | < 0.001 |
| 3-DG                           | 1     | 1.23 (0.84; 1.79)     | 0.287   | 1.48 (1.01; 2.17)    | 0.044   | 1.21 (0.92; 1.58)   | 0.170   |
|                                | 2     | 1.21 (0.90; 1.63)     | 0.194   | 1.28 (0.95; 1.73)    | 0.106   | 1.05 (0.83; 1.33)   | 0.653   |
| SAF                            | 1     | 1.24 (0.99; 1.55)     | 0.057   | 1.56 (1.24; 1.95)    | < 0.001 | 1.26 (1.07; 1.48)   | < 0.001 |
|                                | 2     | 1.30 (1.15; 1.48)     | < 0.001 | 1.50 (1.31; 1.72)    | < 0.001 | 1.16 (1.02; 1.31)   | 0.024   |

Ratios represent the ratio of (geometric mean) levels of the biomarkers in the respective end-stage renal disease group relative to controls and relative to individuals with chronic kidney disease stage 5 non-dialysis.

Model 1: unadjusted; model 2: adjusted for age, sex and diabetes mellitus.

Abbreviations: 3-DG, 3-deoxyglucosone; CEL, N<sup>ε</sup>-(carboxyethyl)lysine; CI, confidence interval; CKD5-D, chronic kidney disease stage 5 dialysis; CKD5-ND, chronic kidney disease stage 5 non-dialysis; CML, N<sup>ε</sup>-(carboxymethyl)lysine; GO, glyoxal; MG-H1, N<sup>ε</sup>-(5-hydro-5-methyl-4-imidazolone-2-yl)ornithine; MGO, methylglyoxal; SAF, skin autofluorescence.

\* Analyses based on (Controls/ CKD5-ND/ CKD5-D) n = 40/48/33 for serum AGEs, n = 40/44/33 for dicarbonyls, and n = 42/47/27 for skin autofluorescence.

Table S4. Associations of end-stage renal disease with advanced glycation endproducts and dicarbonyls with additional adjustment for current smoking

| Biomarker                      | Model | CKD5-ND vs. controls* |         | CKD5-D vs. controls* |         | CKD5-D vs. CKD5-ND* |         |
|--------------------------------|-------|-----------------------|---------|----------------------|---------|---------------------|---------|
|                                |       | Ratio (95%CI)         | P value | Ratio (95%CI)        | P value | Ratio (95%CI)       | P value |
| CML <sub>free</sub>            | 1     | 7.93 (6.38; 9.85)     | < 0.001 | 12.88 (9.90; 16.75)  | < 0.001 | 1.62 (1.29; 2.05)   | < 0.001 |
| CML <sub>protein-bound</sub>   | 1     | 2.48 (2.16; 2.86)     | < 0.001 | 3.08 (2.60; 3.65)    | < 0.001 | 1.24 (1.07; 1.44)   | 0.005   |
| CEL <sub>free</sub>            | 1     | 8.19 (6.46; 10.38)    | < 0.001 | 14.47 (10.85; 19.29) | < 0.001 | 1.77 (1.37; 2.28)   | < 0.001 |
| CEL <sub>protein-bound</sub>   | 1     | 1.12 (0.96; 1.32)     | 0.155   | 1.18 (0.97; 1.43)    | 0.105   | 1.05 (0.88; 1.25)   | 0.612   |
| MG-H1 <sub>free</sub>          | 1     | 9.87 (7.56; 12.87)    | < 0.001 | 16.01 (11.60; 22.09) | < 0.001 | 1.62 (1.22; 2.16)   | 0.001   |
| MG-H1 <sub>protein-bound</sub> | 1     | 1.67 (1.48; 1.87)     | < 0.001 | 1.75 (1.51; 2.02)    | < 0.001 | 1.05 (0.92; 1.19)   | 0.450   |
| GO                             | 1     | 2.26 (1.94; 2.64)     | < 0.001 | 2.82 (2.34; 3.39)    | < 0.001 | 1.24 (1.05; 1.47)   | 0.011   |
| MGO                            | 1     | 2.94 (2.56; 3.37)     | < 0.001 | 3.26 (2.76; 3.85)    | < 0.001 | 1.11 (0.96; 1.29)   | 0.172   |
| 3-DG                           | 1     | 1.35 (1.20; 1.52)     | < 0.001 | 1.20 (1.04; 1.38)    | 0.012   | 0.89 (0.78; 1.01)   | 0.067   |
| SAF                            | 1     | 1.33 (1.23; 1.44)     | < 0.001 | 1.45 (1.31; 1.61)    | < 0.001 | 1.09 (1.00; 1.20)   | 0.056   |

Ratios represent the ratio of (geometric mean) levels of the biomarkers in the respective end-stage renal disease group relative to controls and relative to individuals with chronic kidney disease stage 5 non-dialysis.

Adjusted for age, sex, diabetes mellitus and current smoking.

Abbreviations: 3-DG, 3-deoxyglucosone; CEL, N<sup>ε</sup>-(carboxyethyl)lysine; CI, confidence interval; CKD5-D, chronic kidney disease stage 5 dialysis; CKD5-ND, chronic kidney disease stage 5 non-dialysis; CML, N<sup>ε</sup>-(carboxymethyl)lysine; GO, glyoxal; MG-H1, N<sup>ε</sup>-(5-hydro-5-methyl-4-imidazolone-2-yl)ornithine; MGO, methylglyoxal; SAF, skin autofluorescence.

\* Analyses based on (Controls/ CKD5-ND/ CKD5-D) n = 40/48/33 for serum AGEs, n = 40/44/33 for dicarbonyls, and n = 42/47/27 for skin autofluorescence.

Table S5. Association of estimated glomerular filtration rate (eGFR<sub>CKD-EPI</sub>) with advanced glycation endproducts and dicarbonyls in controls and participants with chronic kidney disease stage 5 non-dialysis

| Biomarker                      | Controls*         |         | CKD5-ND**         |         |
|--------------------------------|-------------------|---------|-------------------|---------|
|                                | Ratio (95%CI)     | P value | Ratio (95%CI)     | P value |
| CML <sub>free</sub>            | 0.98 (0.86; 1.13) | 0.795   | 1.08 (1.02; 1.14) | 0.008   |
| CML <sub>protein-bound</sub>   | 1.05 (0.98; 1.11) | 0.150   | 1.07 (1.04; 1.10) | < 0.001 |
| CEL <sub>free</sub>            | 1.00 (0.85; 1.17) | 0.976   | 1.07 (1.01; 1.13) | 0.028   |
| CEL <sub>protein-bound</sub>   | 0.91 (0.79; 1.04) | 0.153   | 1.03 (0.99; 1.07) | 0.097   |
| MG-H1 <sub>free</sub>          | 1.01 (0.85; 1.21) | 0.892   | 1.08 (1.01; 1.15) | 0.021   |
| MG-H1 <sub>protein-bound</sub> | 0.99 (0.92; 1.06) | 0.725   | 1.05 (1.02; 1.08) | < 0.001 |
| GO                             | 1.07 (0.98; 1.17) | 0.148   | 1.04 (1.01; 1.08) | 0.013   |
| MGO                            | 1.00 (0.96; 1.04) | 0.961   | 1.04 (1.00; 1.09) | 0.030   |
| 3-DG                           | 1.02 (0.95; 1.09) | 0.548   | 1.02 (0.99; 1.05) | 0.221   |
| SAF                            | 1.03 (0.98; 1.08) | 0.252   | 1.00 (0.98; 1.02) | 0.709   |

Ratios represent the ratio of (geometric mean) levels of the biomarkers per 10 mL/min/1.73m<sup>2</sup> lower eGFR in controls and per 1 mL/min/1.73m<sup>2</sup> lower eGFR in CKD5-ND.

All analyses are adjusted for age, sex and diabetes mellitus (in CKD5-ND only as there were no controls with diabetes mellitus).

Abbreviations: 3-DG, 3-deoxyglucosone; CEL, N<sup>ε</sup>-(carboxyethyl)lysine; CI, confidence interval; CKD5-ND, chronic kidney disease stage 5 non-dialysis; CML, N<sup>ε</sup>-(carboxymethyl)lysine; GO, glyoxal; MG-H1, N<sub>6</sub>-(5-hydro-5-methyl-4-imidazolone-2-yl)ornithine; MGO, methylglyoxal; SAF, skin autofluorescence.

\* Analyses based on n = 40 for serum AGEs, n = 40 for dicarbonyls, and n = 42 for skin autofluorescence.

\*\* Analyses based on n = 42 for serum AGEs, n = 38 for dicarbonyls, and n = 40 for skin autofluorescence.

Table S6. Association of estimated residual glomerular filtration rate (eGFR<sub>residual</sub>) with advanced glycation endproducts and dicarbonyls in participants with chronic kidney disease stage 5 dialysis

| Biomarker                      | Ratio (95%CI)     | P value |
|--------------------------------|-------------------|---------|
| CML <sub>free</sub>            | 1.03 (1.02; 1.04) | < 0.001 |
| CML <sub>protein-bound</sub>   | 1.02 (1.01; 1.04) | 0.003   |
| CEL <sub>free</sub>            | 1.03 (1.02; 1.04) | < 0.001 |
| CEL <sub>protein-bound</sub>   | 1.00 (0.99; 1.01) | 0.859   |
| MG-H1 <sub>free</sub>          | 1.04 (1.02; 1.06) | < 0.001 |
| MG-H1 <sub>protein-bound</sub> | 1.01 (1.00; 1.02) | 0.011   |
| GO                             | 1.03 (1.02; 1.04) | < 0.001 |
| MGO                            | 1.02 (1.01; 1.03) | < 0.001 |
| 3-DG                           | 1.01 (1.00; 1.02) | 0.168   |
| SAF                            | 0.99 (0.98; 1.00) | 0.040   |

Ratios represent the ratio of (geometric mean) levels of the biomarkers per 1 mL/min/1.73m<sup>2</sup> lower estimated residual GFR.

All analyses are adjusted for age, sex and diabetes mellitus.

Abbreviations: 3-DG, 3-deoxyglucosone; CEL, N<sup>ε</sup>-(carboxyethyl)lysine; CI, confidence interval; CML, N<sup>ε</sup>-(carboxymethyl)lysine; GO, glyoxal; MG-H1, N<sup>ε</sup>-(5-hydro-5-methyl-4-imidazolone-2-yl)ornithine; MGO, methylglyoxal; SAF, skin autofluorescence.

Analyses based on n = 25 for serum AGEs, n = 25 for dicarbonyls, and n = 18 for skin autofluorescence.

Table S7. Association of residual urine output with advanced glycation endproducts and dicarbonyls in participants with chronic kidney disease stage 5 dialysis

| Biomarker                      | Ratio (95%CI)     | P value |
|--------------------------------|-------------------|---------|
| CML <sub>free</sub>            | 1.02 (1.00; 1.04) | 0.039   |
| CML <sub>protein-bound</sub>   | 1.02 (1.01; 1.04) | 0.012   |
| CEL <sub>free</sub>            | 1.03 (1.01; 1.05) | 0.015   |
| CEL <sub>protein-bound</sub>   | 1.01 (1.00; 1.02) | 0.073   |
| MG-H1 <sub>free</sub>          | 1.04 (1.01; 1.07) | 0.006   |
| MG-H1 <sub>protein-bound</sub> | 1.01 (1.00; 1.03) | 0.045   |
| GO                             | 1.03 (1.02; 1.05) | < 0.001 |
| MGO                            | 1.03 (1.02; 1.04) | < 0.001 |
| 3-DG                           | 1.01 (0.99; 1.02) | 0.370   |
| SAF                            | 1.00 (0.99; 1.01) | 0.760   |

Ratios represent the ratio of (geometric mean) levels of the biomarkers per 100 mL/24h lower residual urine output.

All analyses are adjusted for age, sex and diabetes mellitus.

Abbreviations: 3-DG, 3-deoxyglucosone; CEL, N<sup>ε</sup>-(carboxyethyl)lysine; CI, confidence interval; CML, N<sup>ε</sup>-(carboxymethyl)lysine; GO, glyoxal; MG-H1, N<sup>ε</sup>-(5-hydro-5-methyl-4-imidazolone-2-yl)ornithine; MGO, methylglyoxal; SAF, skin autofluorescence.

Analyses based on n = 33 for serum AGEs, n = 33 for dicarbonyls, and n = 27 for skin autofluorescence.



Table S8. Association of dialysis vintage with advanced glycation endproducts and dicarbonyls in participants with chronic kidney disease stage 5 dialysis

| Biomarker                      | Ratio (95%CI)     | P value |
|--------------------------------|-------------------|---------|
| CML <sub>free</sub>            | 1.09 (0.99; 1.19) | 0.081   |
| CML <sub>protein-bound</sub>   | 1.04 (0.95; 1.13) | 0.360   |
| CEL <sub>free</sub>            | 1.11 (1.02; 1.21) | 0.017   |
| CEL <sub>protein-bound</sub>   | 1.04 (0.98; 1.10) | 0.169   |
| MG-H1 <sub>free</sub>          | 1.19 (1.06; 1.34) | 0.006   |
| MG-H1 <sub>protein-bound</sub> | 1.07 (1.01; 1.13) | 0.028   |
| GO                             | 1.05 (0.97; 1.13) | 0.235   |
| MGO                            | 1.05 (0.99; 1.11) | 0.126   |
| 3-DG                           | 1.05 (0.99; 1.11) | 0.126   |
| SAF                            | 1.01 (0.94; 1.08) | 0.839   |

Ratios represent the ratio of (geometric mean) levels of the biomarkers per 1 year longer dialysis vintage.

All analyses are adjusted for age, sex and diabetes mellitus.

Abbreviations: 3-DG, 3-deoxyglucosone; CEL, N<sup>ε</sup>-(carboxyethyl)lysine; CI, confidence interval; CML, N<sup>ε</sup>-(carboxymethyl)lysine; GO, glyoxal; MG-H1, N<sup>ε</sup>-(5-hydro-5-methyl-4-imidazolone-2-yl)ornithine; MGO, methylglyoxal; SAF, skin autofluorescence.

Analyses based on n = 27 for serum AGEs, n = 27 for dicarbonyls, and n = 20 for skin autofluorescence.

Table S9. Cross-sectional comparison of participants on hemodialysis and peritoneal dialysis

| Biomarker                      | Biomarker level*       |                        | PD vs. HD*        |                |
|--------------------------------|------------------------|------------------------|-------------------|----------------|
|                                | HD                     | PD                     | Ratio (95%CI)     | <i>P</i> value |
| CML <sub>free</sub>            | 1783.3 [1550.2-2382.8] | 1558.1 [798.7-2357.4]  | 0.72 (0.52; 0.99) | 0.047          |
| CML <sub>protein-bound</sub>   | 268.9 [212.8-326.1]    | 301.3 [149.0-406.7]    | 0.95 (0.69; 1.29) | 0.716          |
| CEL <sub>free</sub>            | 1527.3 [1031.3-1733.5] | 1058.8 [664.5-1310.4]  | 0.74 (0.52; 1.06) | 0.096          |
| CEL <sub>protein-bound</sub>   | 63.9 [46.9-77.8]       | 57.6 [53.8-62.5]       | 0.95 (0.77; 1.16) | 0.586          |
| MG-H1 <sub>free</sub>          | 4312.8 [3326.9-5218.6] | 2624.8 [1472.7-4479.1] | 0.61 (0.39; 0.93) | 0.025          |
| MG-H1 <sub>protein-bound</sub> | 62.7 [54.8-71.5]       | 53.0 [44.5-73.8]       | 0.85 (0.68; 1.05) | 0.117          |
| GO                             | 2653.8 [1865.0-2952.4] | 2096.0 [1361.3-3077.9] | 0.85 (0.64; 1.12) | 0.246          |
| MGO                            | 1217.0 [1015.6-1479.9] | 1139.1 [857.0-1519.2]  | 0.86 (0.70; 1.07) | 0.173          |
| 3-DG                           | 1518.7 [1388.2-1946.6] | 1717.7 [1408.1-1854.9] | 0.99 (0.79; 1.24) | 0.933          |
| SAF                            | 3.7 ±0.7               | 3.4 ±0.7               | 0.97 (0.81; 1.17) | 0.748          |

Ratios represent the ratio of (geometric mean) levels of the biomarkers in participants on peritoneal dialysis relative to participants on hemodialysis.

All analyses are adjusted for age, sex and diabetes mellitus.

Abbreviations: 3-DG, 3-deoxyglucosone; CEL, *N*<sup>ε</sup>-(carboxyethyl)lysine; CI, confidence interval; CML, *N*<sup>ε</sup>-(carboxymethyl)lysine; GO, glyoxal; MG-H1, *N*<sub>6</sub>-(5-hydro-5-methyl-4-imidazolone-2-yl)ornithine; MGO, methylglyoxal; SAF, skin autofluorescence.

\* Analyses based on (hemodialysis/ peritoneal dialysis) n = 20/13 for serum AGEs, n = 20/13 for dicarbonyls, and n = 13/14 for skin autofluorescence.

Table S10. Course of advanced glycation endproducts and dicarbonyls stratified by dialysis modality

| Biomarkers                                        | Modality | Ratios of biomarker levels following dialysis initiation relative to baseline levels* |         |                       |         |                        |         | Statistical interaction (month)** |
|---------------------------------------------------|----------|---------------------------------------------------------------------------------------|---------|-----------------------|---------|------------------------|---------|-----------------------------------|
|                                                   |          | 1 month vs. baseline                                                                  |         | 6 months vs. baseline |         | 12 months vs. baseline |         |                                   |
|                                                   |          | Ratio (95%CI)                                                                         | P value | Ratio (95%CI)         | P value | Ratio (95%CI)          | P value |                                   |
| CML <sub>free</sub> (nmol/L)                      | HD       | 0.90 (0.72; 1.13)                                                                     | 0.373   | 1.49 (1.19; 1.89)     | < 0.001 | 1.48 (1.16; 1.89)      | 0.002   | Yes<br>6 and 12                   |
|                                                   | PD       | 0.87 (0.69; 1.08)                                                                     | 0.201   | 0.87 (0.70; 1.09)     | 0.225   | 0.99 (0.78; 1.25)      | 0.920   |                                   |
| CML <sub>protein-bound</sub> (nmol/mmol lysine)   | HD       | 0.97 (0.86; 1.10)                                                                     | 0.662   | 1.25 (1.11; 1.42)     | < 0.001 | 1.33 (1.16; 1.51)      | < 0.001 | No                                |
|                                                   | PD       | 0.88 (0.78; 0.99)                                                                     | 0.039   | 1.11 (0.98; 1.26)     | 0.088   | 1.18 (1.04; 1.33)      | 0.013   |                                   |
| CEL <sub>free</sub> (nmol/L)                      | HD       | 0.94 (0.73; 1.20)                                                                     | 0.605   | 1.59 (1.23; 2.05)     | < 0.001 | 1.55 (1.19; 2.03)      | 0.001   | Yes<br>6 and 12                   |
|                                                   | PD       | 0.81 (0.63; 1.04)                                                                     | 0.092   | 0.76 (0.59; 0.97)     | 0.027   | 0.85 (0.66; 1.10)      | 0.207   |                                   |
| CEL <sub>protein-bound</sub> (nmol/mmol lysine)   | HD       | 1.15 (0.99; 1.34)                                                                     | 0.066   | 1.23 (1.06; 1.44)     | 0.009   | 1.32 (1.13; 1.55)      | < 0.001 | Yes<br>1, 6 and 12                |
|                                                   | PD       | 0.95 (0.82; 1.10)                                                                     | 0.475   | 1.02 (0.88; 1.18)     | 0.797   | 0.95 (0.82; 1.11)      | 0.528   |                                   |
| MG-H1 <sub>free</sub> (nmol/L)                    | HD       | 1.00 (0.75; 1.32)                                                                     | 0.973   | 1.70 (1.28; 2.26)     | < 0.001 | 1.46 (1.08; 1.97)      | 0.014   | Yes<br>6 and 12                   |
|                                                   | PD       | 0.90 (0.69; 1.19)                                                                     | 0.458   | 0.78 (0.60; 1.03)     | 0.084   | 1.02 (0.77; 1.36)      | 0.891   |                                   |
| MG-H1 <sub>protein-bound</sub> (nmol/mmol lysine) | HD       | 1.04 (0.93; 1.15)                                                                     | 0.519   | 1.15 (1.03; 1.28)     | 0.012   | 1.18 (1.06; 1.33)      | 0.004   | Yes<br>1, 6 and 12                |
|                                                   | PD       | 0.88 (0.79; 0.97)                                                                     | 0.012   | 0.94 (0.85; 1.04)     | 0.231   | 0.97 (0.88; 1.08)      | 0.633   |                                   |
| GO (nmol/L)                                       | HD       | 0.84 (0.69; 1.02)                                                                     | 0.077   | 1.37 (1.13; 1.67)     | 0.002   | 1.42 (1.16; 1.73)      | < 0.001 | Yes<br>6 and 12                   |
|                                                   | PD       | 0.90 (0.75; 1.08)                                                                     | 0.253   | 1.09 (0.90; 1.31)     | 0.385   | 1.11 (0.91; 1.34)      | 0.294   |                                   |
| MGO (nmol/L)                                      | HD       | 0.77 (0.65; 0.92)                                                                     | 0.004   | 1.06 (0.89; 1.26)     | 0.526   | 1.07 (0.89; 1.29)      | 0.457   | No                                |
|                                                   | PD       | 0.89 (0.75; 1.06)                                                                     | 0.188   | 0.99 (0.83; 1.17)     | 0.876   | 1.07 (0.90; 1.28)      | 0.426   |                                   |
| 3-DG (nmol/L)                                     | HD       | 0.86 (0.76; 0.98)                                                                     | 0.027   | 0.92 (0.80; 1.04)     | 0.186   | 0.96 (0.84; 1.10)      | 0.530   | Yes<br>1                          |
|                                                   | PD       | 1.02 (0.90; 1.15)                                                                     | 0.774   | 0.99 (0.87; 1.12)     | 0.864   | 0.84 (0.74; 0.95)      | 0.007   |                                   |
| SAF (AU)                                          | HD       | 1.00 (0.93; 1.08)                                                                     | 0.948   | 0.97 (0.90; 1.04)     | 0.378   | 0.96 (0.89; 1.04)      | 0.329   | No                                |
|                                                   | PD       | 0.97 (0.90; 1.06)                                                                     | 0.522   | 1.00 (0.92; 1.08)     | 0.919   | 0.98 (0.90; 1.06)      | 0.556   |                                   |

Ratios represent the ratio of (geometric mean) levels of the biomarkers at the respective time point after dialysis initiation or kidney transplantation relative to baseline levels based on a linear mixed model containing categorical time, dialysis modality, an interaction term between categorical time and dialysis modality, age, sex, diabetes mellitus, and a random intercept.

Abbreviations: 3-DG, 3-deoxyglucosone; AU, arbitrary units; CEL, N<sup>ε</sup>-(carboxyethyl)lysine; CML, N<sup>ε</sup>-(carboxymethyl)lysine; GO, glyoxal; MG-H1, N<sup>ε</sup>-(5-hydroxy-5-methyl-4-imidazolone-2-yl)ornithine; MGO, methylglyoxal; NA, not applicable; SAF, skin autofluorescence.

\* Analyses based on (baseline/ 1/ 6/ 12 months) n = 41/ 41/ 40/ 35 for serum advanced glycation endproducts, n = 37/ 41/ 40/ 35 for dicarbonyls, and n = 38/ 37/ 40/ 34 for skin autofluorescence, respectively.

\*\* Yes if  $P_{interaction} < 0.100$  for the interaction term between categorical time and dialysis.

Table S11. Course of advanced glycation endproducts and dicarbonyls stratified by dialysis modality with additional adjustment for estimated residual glomerular filtration rate

| Biomarkers                                        | Modality | Ratios of biomarker levels following dialysis initiation relative to baseline levels* |         |                       |         |                        |         | Statistical interaction (month)** |
|---------------------------------------------------|----------|---------------------------------------------------------------------------------------|---------|-----------------------|---------|------------------------|---------|-----------------------------------|
|                                                   |          | 1 month vs. baseline                                                                  |         | 6 months vs. baseline |         | 12 months vs. baseline |         |                                   |
|                                                   |          | Ratio (95%CI)                                                                         | P value | Ratio (95%CI)         | P value | Ratio (95%CI)          | P value |                                   |
| CML <sub>free</sub> (nmol/L)                      | HD       | 0.92 (0.79; 1.08)                                                                     | 0.312   | 1.22 (1.03; 1.44)     | 0.021   | 1.19 (0.99; 1.42)      | 0.064   | Yes                               |
|                                                   | PD       | 0.81 (0.68; 0.96)                                                                     | 0.014   | 0.78 (0.66; 0.93)     | 0.005   | 0.83 (0.69; 1.00)      | 0.048   | 6 and 12                          |
| CML <sub>protein-bound</sub> (nmol/mmol lysine)   | HD       | 0.96 (0.86; 1.08)                                                                     | 0.532   | 1.27 (1.12; 1.44)     | < 0.001 | 1.32 (1.16; 1.51)      | < 0.001 | Yes                               |
|                                                   | PD       | 0.87 (0.77; 0.99)                                                                     | 0.038   | 1.04 (0.92; 1.19)     | 0.500   | 1.08 (0.94; 1.24)      | 0.249   | 6 and 12                          |
| CEL <sub>free</sub> (nmol/L)                      | HD       | 0.97 (0.81; 1.16)                                                                     | 0.728   | 1.30 (1.01; 1.57)     | 0.009   | 1.24 (1.01; 1.52)      | 0.044   | Yes                               |
|                                                   | PD       | 0.75 (0.61; 0.92)                                                                     | 0.005   | 0.73 (0.59; 0.89)     | 0.002   | 0.73 (0.59; 0.90)      | 0.004   | 1, 6 and 12                       |
| CEL <sub>protein-bound</sub> (nmol/mmol lysine)   | HD       | 1.16 (0.99; 1.35)                                                                     | 0.062   | 1.23 (1.05; 1.46)     | 0.013   | 1.29 (1.08; 1.54)      | 0.006   | Yes                               |
|                                                   | PD       | 0.98 (0.83; 1.16)                                                                     | 0.796   | 0.97 (0.82; 1.15)     | 0.696   | 0.83 (0.70; 1.00)      | 0.049   | 6 and 12                          |
| MG-H1 <sub>free</sub> (nmol/L)                    | HD       | 1.03 (0.80; 1.32)                                                                     | 0.828   | 1.40 (1.08; 1.83)     | 0.013   | 1.16 (0.87; 1.55)      | 0.297   | Yes                               |
|                                                   | PD       | 0.83 (0.63; 1.09)                                                                     | 0.179   | 0.75 (0.57; 0.99)     | 0.039   | 0.86 (0.64; 1.14)      | 0.287   | 6                                 |
| MG-H1 <sub>protein-bound</sub> (nmol/mmol lysine) | HD       | 1.03 (0.92; 1.14)                                                                     | 0.619   | 1.15 (1.03; 1.28)     | 0.016   | 1.17 (1.04; 1.32)      | 0.010   | Yes                               |
|                                                   | PD       | 0.89 (0.79; 0.99)                                                                     | 0.038   | 0.92 (0.82; 1.03)     | 0.139   | 0.94 (0.83; 1.06)      | 0.280   | 1, 6 and 12                       |
| GO (nmol/L)                                       | HD       | 0.84 (0.73; 0.97)                                                                     | 0.021   | 1.23 (1.06; 1.43)     | 0.008   | 1.23 (1.05; 1.45)      | 0.012   | No                                |
|                                                   | PD       | 0.90 (0.77; 1.06)                                                                     | 0.192   | 1.04 (0.88; 1.21)     | 0.668   | 1.03 (0.97; 1.22)      | 0.726   |                                   |
| MGO (nmol/L)                                      | HD       | 0.78 (0.68; 0.91)                                                                     | 0.002   | 0.96 (0.82; 1.13)     | 0.650   | 0.94 (0.80; 1.11)      | 0.464   | No                                |
|                                                   | PD       | 0.89 (0.76; 1.05)                                                                     | 0.177   | 0.94 (0.80; 1.10)     | 0.437   | 1.02 (0.85; 1.21)      | 0.863   |                                   |
| 3-DG (nmol/L)                                     | HD       | 0.87 (0.76; 1.00)                                                                     | 0.043   | 0.91 (0.79; 1.05)     | 0.193   | 0.94 (0.81; 1.09)      | 0.403   | No                                |
|                                                   | PD       | 0.98 (0.85; 1.14)                                                                     | 0.828   | 0.98 (0.85; 1.14)     | 0.822   | 0.82 (0.70; 0.96)      | 0.012   |                                   |
| SAF (AU)                                          | HD       | 1.02 (0.94; 1.10)                                                                     | 0.628   | 0.99 (0.92; 1.08)     | 0.875   | 0.94 (0.86; 1.03)      | 0.199   | No                                |
|                                                   | PD       | 0.96 (0.88; 1.06)                                                                     | 0.450   | 1.00 (0.91; 1.10)     | 0.949   | 0.95 (0.86; 1.05)      | 0.274   |                                   |

Ratios represent the ratio of (geometric mean) levels of the biomarkers at the respective time point after dialysis initiation or kidney transplantation relative to baseline levels based on a linear mixed model containing categorical time, dialysis modality, an interaction term between categorical time and dialysis modality, age, sex, diabetes mellitus, eGFR<sub>residual</sub> and a random intercept.

Abbreviations: 3-DG, 3-deoxyglucosone; AU, arbitrary units; CEL, N<sup>ε</sup>-(carboxyethyl)lysine; CML, N<sup>ε</sup>-(carboxymethyl)lysine; GO, glyoxal; MG-H1, N<sup>ε</sup>-(5-hydroxy-5-methyl-4-imidazolone-2-yl)ornithine; MGO, methylglyoxal; NA, not applicable; SAF, skin autofluorescence.

\* Analyses based on (baseline/ 1/ 6/ 12 months) n = 41/ 41/ 40/ 35 for serum advanced glycation endproducts, n = 37/ 41/ 40/ 35 for dicarbonyls, and n = 38/ 37/ 40/ 34 for skin autofluorescence, respectively.

\*\* Yes if P<sub>interaction</sub> < 0.100 for the interaction term between categorical time and dialysis.

Table S12. Course of advanced glycation endproducts and dicarbonyls stratified by dialysis modality with additional adjustment for serum  $\beta$ 2-microglobulin

| Biomarkers                                        | Modality | Ratios of biomarker levels following dialysis initiation relative to baseline levels* |         |                       |         |                        |         | Statistical interaction (month)** |
|---------------------------------------------------|----------|---------------------------------------------------------------------------------------|---------|-----------------------|---------|------------------------|---------|-----------------------------------|
|                                                   |          | 1 month vs. baseline                                                                  |         | 6 months vs. baseline |         | 12 months vs. baseline |         |                                   |
|                                                   |          | Ratio (95%CI)                                                                         | P value | Ratio (95%CI)         | P value | Ratio (95%CI)          | P value |                                   |
| CML <sub>free</sub> (nmol/L)                      | HD       | 0.82 (0.66; 1.01)                                                                     | 0.063   | 1.04 (0.82; 1.32)     | 0.762   | 0.86 (0.65; 1.14)      | 0.294   | Yes                               |
|                                                   | PD       | 0.77 (0.61; 0.97)                                                                     | 0.025   | 0.76 (0.60; 0.96)     | 0.022   | 0.79 (0.62; 1.01)      | 0.064   | 6                                 |
| CML <sub>protein-bound</sub> (nmol/mmol lysine)   | HD       | 0.93 (0.83; 1.04)                                                                     | 0.193   | 1.11 (0.97; 1.26)     | 0.123   | 1.08 (0.93; 1.26)      | 0.312   | No                                |
|                                                   | PD       | 0.85 (0.75; 0.96)                                                                     | 0.009   | 1.01 (0.90; 1.14)     | 0.847   | 1.00 (0.88; 1.15)      | 0.958   |                                   |
| CEL <sub>free</sub> (nmol/L)                      | HD       | 0.86 (0.68; 1.10)                                                                     | 0.229   | 1.13 (0.86; 1.47)     | 0.371   | 0.92 (0.68; 1.24)      | 0.579   | Yes                               |
|                                                   | PD       | 0.71 (0.55; 0.93)                                                                     | 0.012   | 0.71 (0.55; 0.93)     | 0.013   | 0.71 (0.53; 0.93)      | 0.016   | 6                                 |
| CEL <sub>protein-bound</sub> (nmol/mmol lysine)   | HD       | 1.13 (0.97; 1.31)                                                                     | 0.128   | 1.14 (0.95; 1.36)     | 0.148   | 1.13 (0.92; 1.40)      | 0.229   | Yes                               |
|                                                   | PD       | 0.96 (0.81; 1.14)                                                                     | 0.640   | 0.95 (0.80; 1.12)     | 0.547   | 0.80 (0.67; 0.96)      | 0.017   | 12                                |
| MG-H1 <sub>free</sub> (nmol/L)                    | HD       | 0.91 (0.69; 1.19)                                                                     | 0.468   | 1.14 (0.84; 1.54)     | 0.401   | 0.78 (0.55; 1.11)      | 0.167   | Yes                               |
|                                                   | PD       | 0.78 (0.58; 1.05)                                                                     | 0.103   | 0.72 (0.54; 0.97)     | 0.030   | 0.79 (0.58; 1.09)      | 0.147   | 6                                 |
| MG-H1 <sub>protein-bound</sub> (nmol/mmol lysine) | HD       | 1.00 (0.90; 1.11)                                                                     | 0.970   | 1.05 (0.93; 1.18)     | 0.440   | 1.02 (0.89; 1.18)      | 0.440   | Yes                               |
|                                                   | PD       | 0.87 (0.78; 0.97)                                                                     | 0.014   | 0.90 (0.80; 1.01)     | 0.061   | 0.89 (0.79; 1.01)      | 0.060   | 1 and 6                           |
| GO (nmol/L)                                       | HD       | 0.78 (0.66; 0.92)                                                                     | 0.004   | 1.09 (0.91; 1.31)     | 0.358   | 0.99 (0.81; 1.21)      | 0.917   | No                                |
|                                                   | PD       | 0.88 (0.73; 1.05)                                                                     | 0.161   | 1.03 (0.86; 1.23)     | 0.768   | 1.00 (0.83; 1.22)      | 0.969   |                                   |
| MGO (nmol/L)                                      | HD       | 0.73 (0.61; 0.87)                                                                     | < 0.001 | 0.88 (0.72; 1.06)     | 0.168   | 0.78 (0.63; 0.96)      | 0.023   | No                                |
|                                                   | PD       | 0.87 (0.72; 1.05)                                                                     | 0.150   | 0.92 (0.76; 1.11)     | 0.395   | 0.98 (0.80; 1.20)      | 0.829   |                                   |
| 3-DG (nmol/L)                                     | HD       | 0.86 (0.75; 0.98)                                                                     | 0.025   | 0.88 (0.75; 1.02)     | 0.078   | 0.88 (0.75; 1.04)      | 0.134   | No                                |
|                                                   | PD       | 0.98 (0.84; 1.13)                                                                     | 0.754   | 0.98 (0.84; 1.13)     | 0.759   | 0.80 (0.69; 0.94)      | 0.008   |                                   |
| SAF (AU)                                          | HD       | 1.02 (0.94; 1.10)                                                                     | 0.693   | 0.98 (0.90; 1.07)     | 0.658   | 0.92 (0.83; 1.03)      | 0.148   | No                                |
|                                                   | PD       | 0.96 (0.87; 1.06)                                                                     | 0.402   | 1.00 (0.91; 1.10)     | 0.988   | 0.94 (0.85; 1.04)      | 0.225   |                                   |

Ratios represent the ratio of (geometric mean) levels of the biomarkers at the respective time point after dialysis initiation or kidney transplantation relative to baseline levels based on a linear mixed model containing categorical time, dialysis modality, an interaction term between categorical time and dialysis modality, age, sex, diabetes mellitus, serum  $\beta$ 2-microglobulin and a random intercept.

Abbreviations: 3-DG, 3-deoxyglucosone; AU, arbitrary units; CEL, N<sup>ε</sup>-(carboxyethyl)lysine; CML, N<sup>ε</sup>-(carboxymethyl)lysine; GO, glyoxal; MG-H1, N<sup>ε</sup>-(5-hydro-5-methyl-4-imidazolone-2-yl)ornithine; MGO, methylglyoxal; NA, not applicable; SAF, skin autofluorescence.

\* Analyses based on (baseline/ 1/ 6/ 12 months) n = 41/ 41/ 40/ 35 for serum advanced glycation endproducts, n = 37/ 41/ 40/ 35 for dicarbonyls, and n = 38/ 37/ 40/ 34 for skin autofluorescence, respectively.

\*\* Yes if  $P_{interaction} < 0.100$  for the interaction term between categorical time and dialysis.

Figure S1. Flowchart depicting the derivation of the cross-sectional and longitudinal study populations

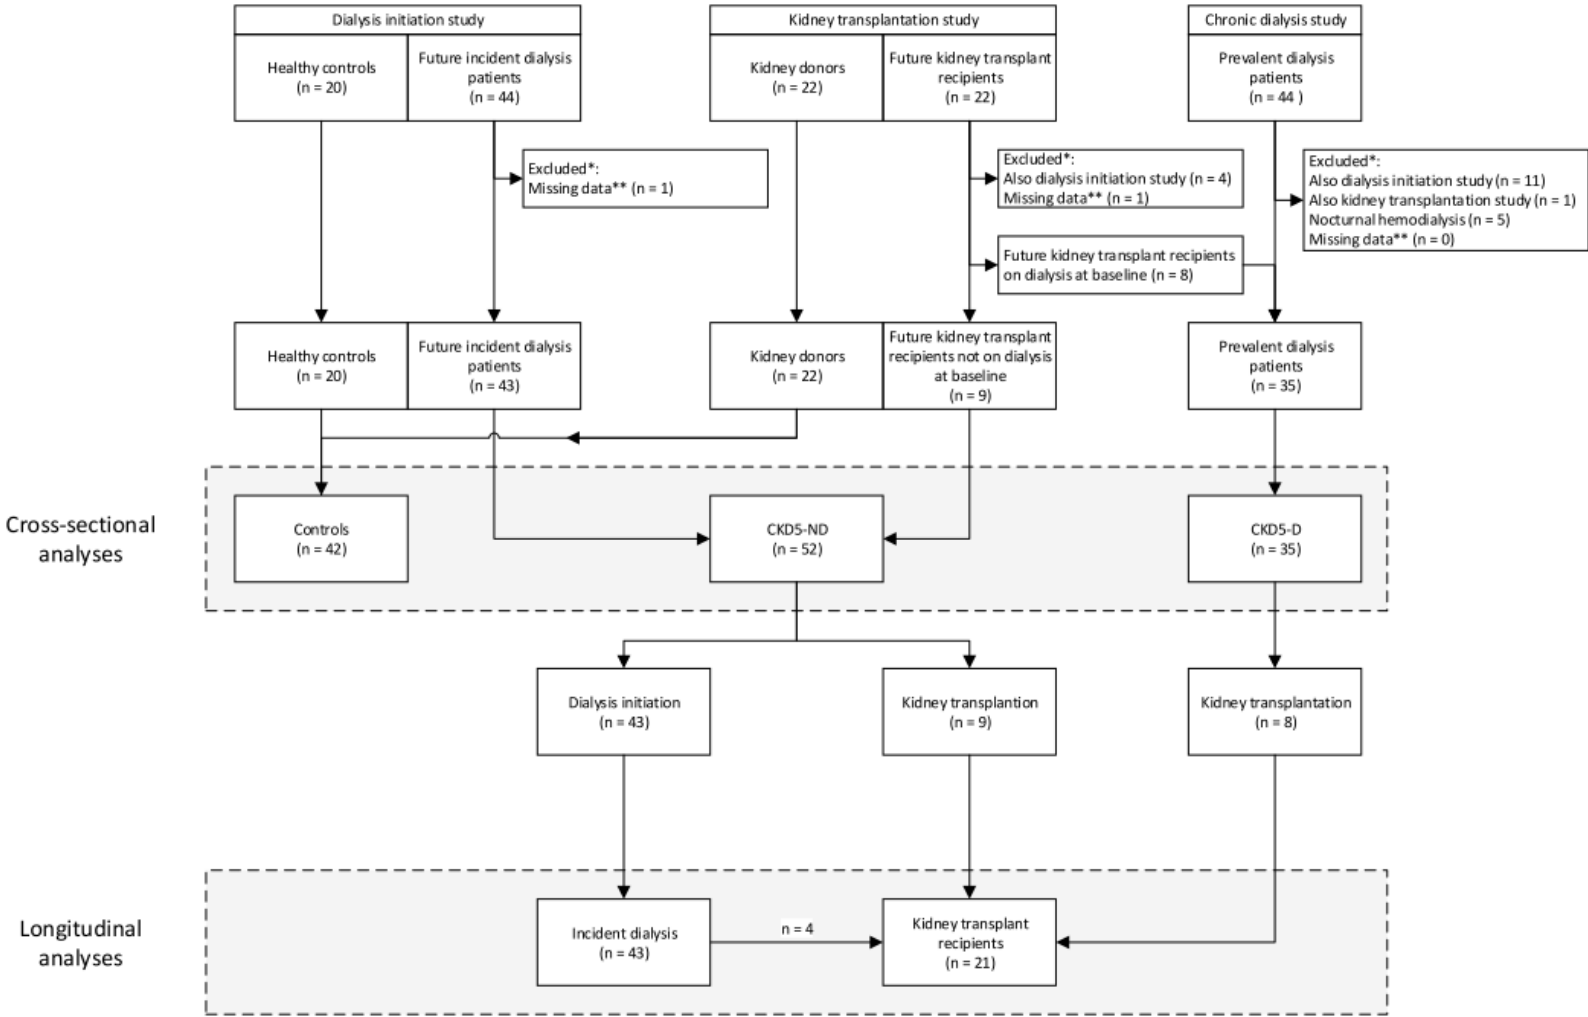

Figure S1. Flowchart depicting the derivation of the cross-sectional and longitudinal study populations. Abbreviations: CKD5-D, chronic kidney disease stage 5 dialysis; CKD5-ND, chronic kidney disease stage 5 non-dialysis. \* Participants were sequentially excluded for the reasons described in the figure (*i.e.* counts are mutually exclusive). \*\* Missing data indicates absence of data on serum advanced glycation endproducts, serum dicarbonyls and skin autofluorescence at baseline.

Figure S2. Correlation matrices between advanced glycation endproducts and dicarbonyls stratified by participant group

A. Controls

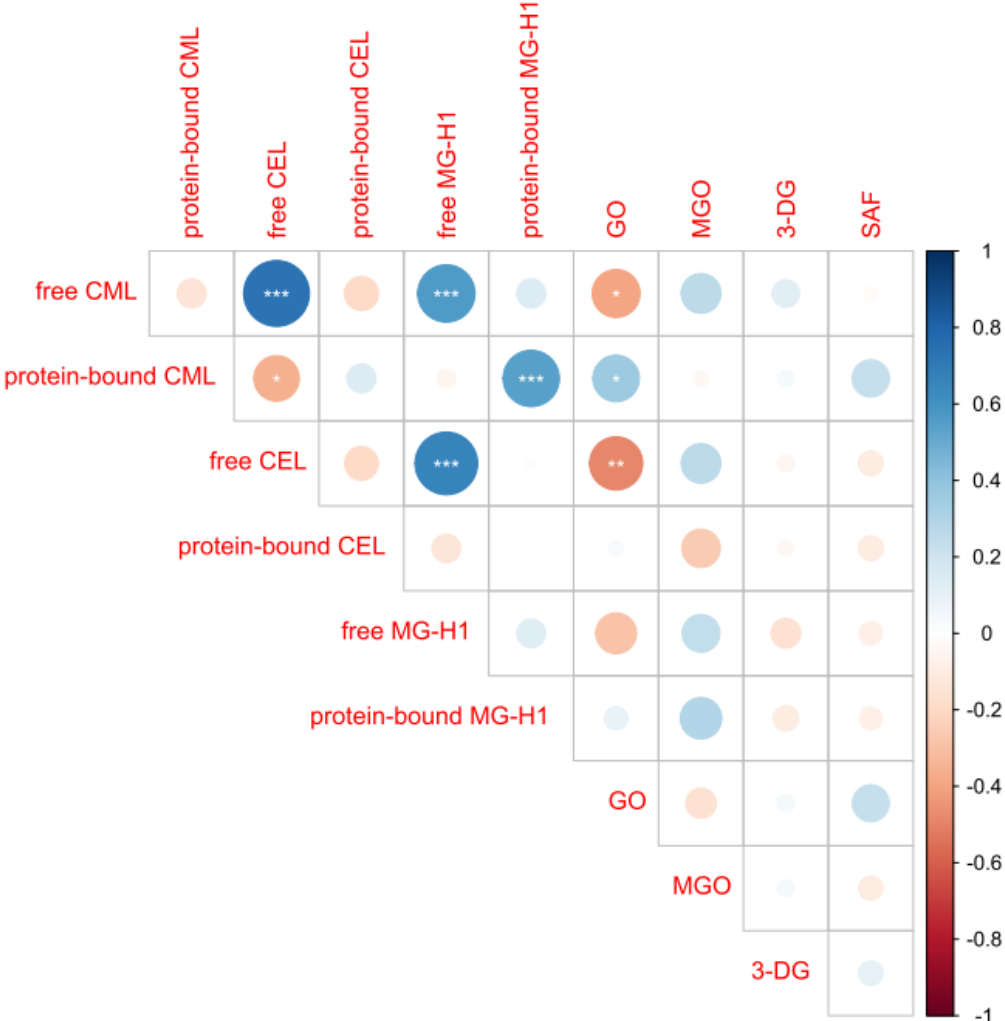



B. CKD5-ND

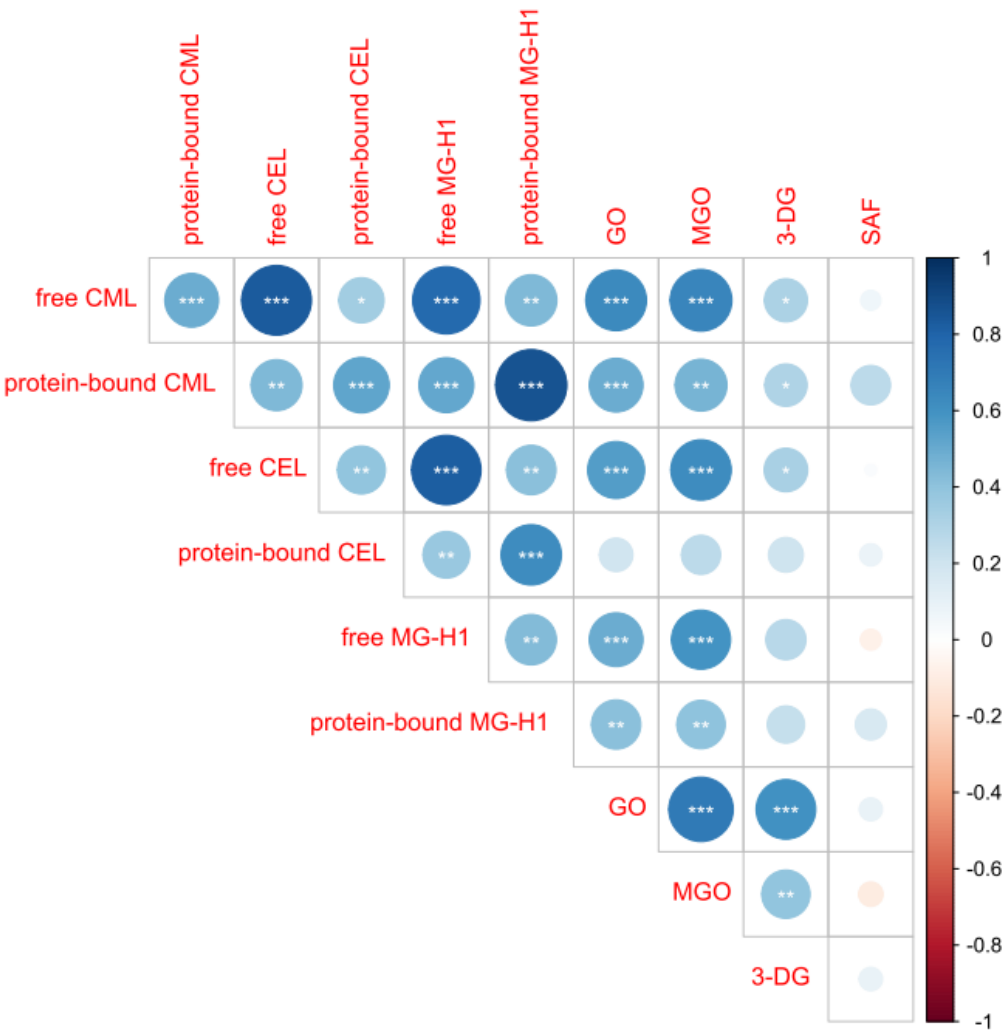

### C. CKD5-D

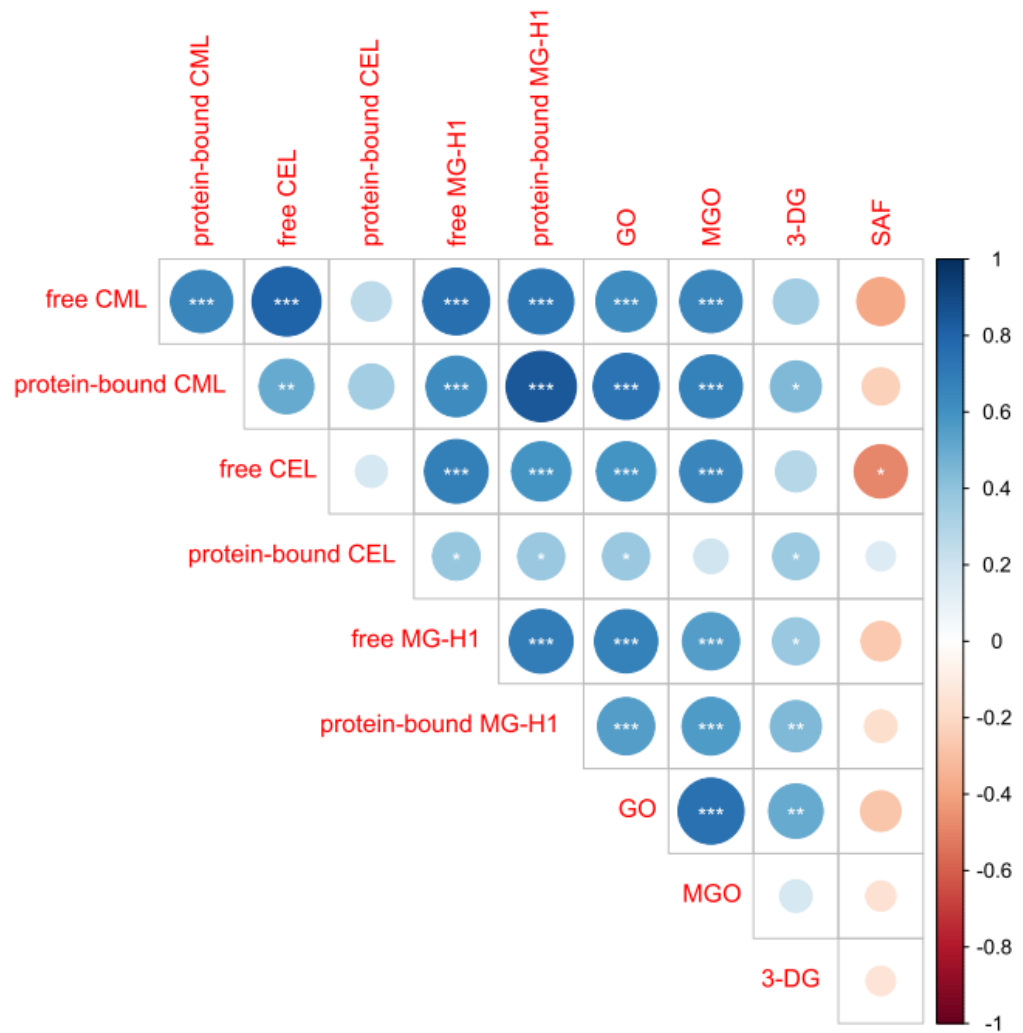

Figure S2. Correlation matrices between advanced glycation endproducts and dicarbonyls stratified by participant group. Circle area and color indicate strength of Spearman's rank correlation coefficients. Abbreviations: 3-DG, 3-deoxyglucosone; CEL,  $N^{\epsilon}$ -(carboxyethyl)lysine; CKD5-D, chronic kidney disease stage 5 dialysis; CKD5-ND, chronic kidney disease stage 5 non-dialysis; CML,  $N^{\epsilon}$ -(carboxymethyl)lysine; GO, glyoxal; MG-H1,  $N^{\epsilon}$ -(5-hydro-5-methyl-4-imidazolone-2-yl)ornithine; MGO, methylglyoxal; SAF, skin autofluorescence. \*  $P < 0.050$ , \*\*  $P < 0.010$ , \*\*\*  $P < 0.001$ .

Figure S3. Boxplots of serum advanced glycation endproducts, dicarbonyls and skin autofluorescence over time in incident dialysis patients stratified by dialysis modality

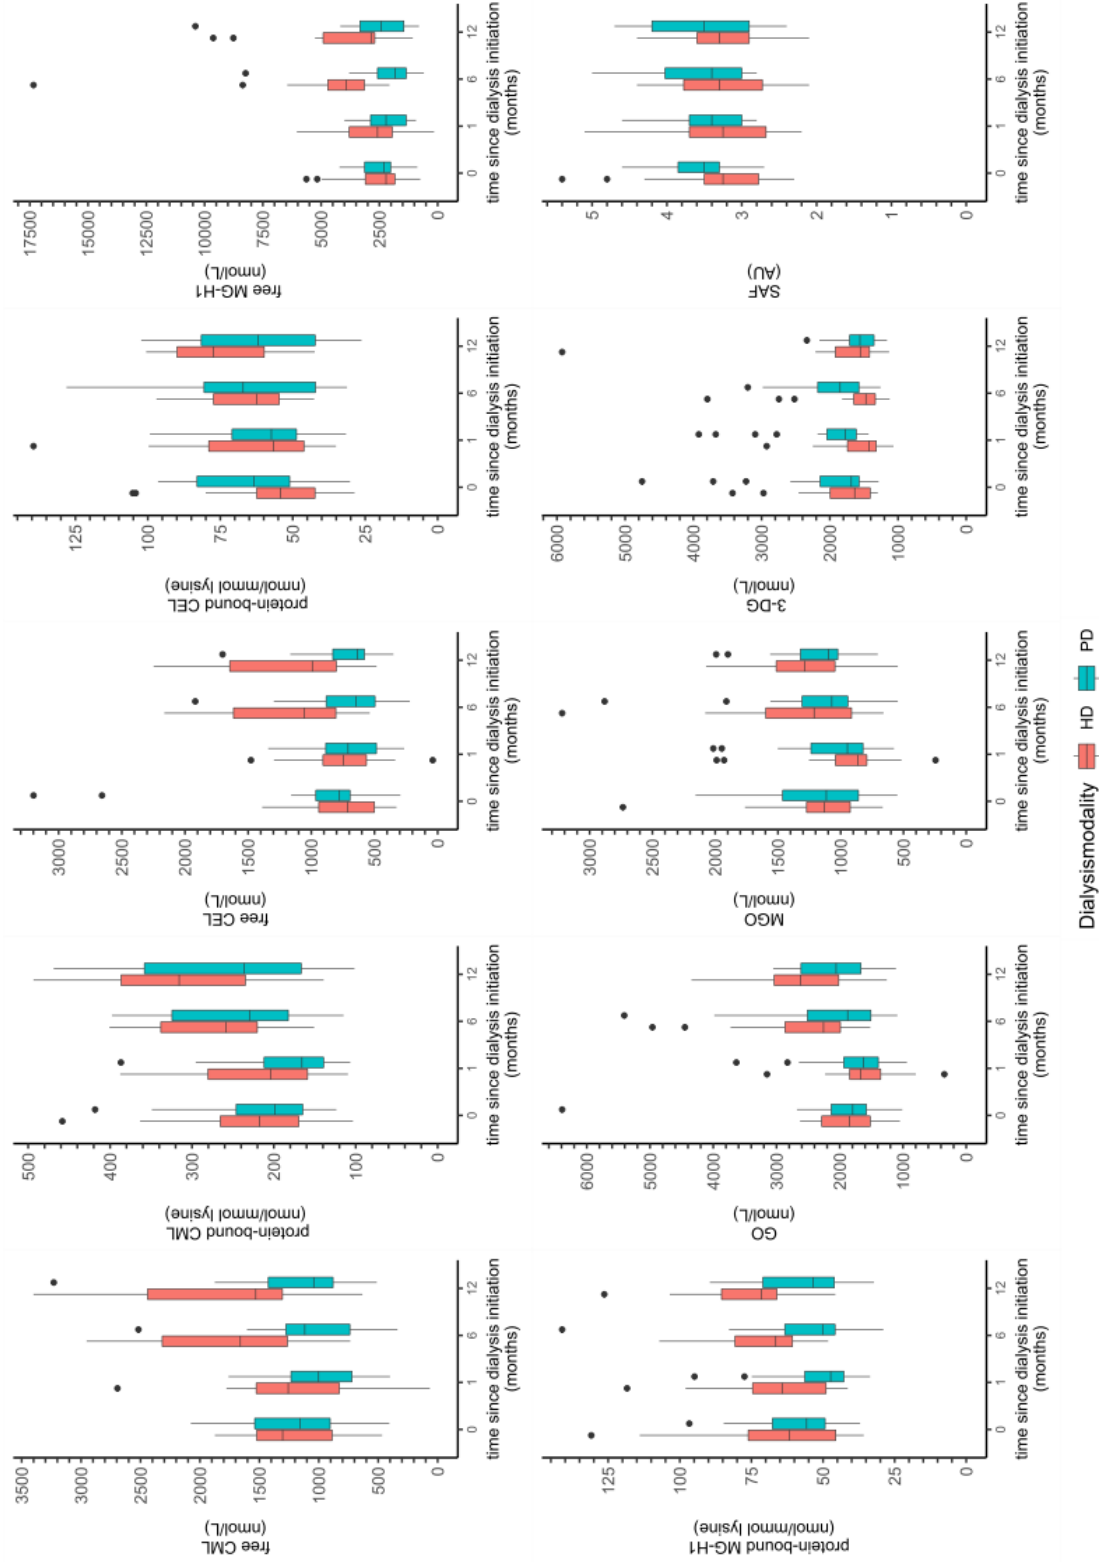

Figure S3. Boxplots of serum advanced glycation endproducts, dicarbonyls and skin autofluorescence over time in incident dialysis patients stratified by dialysis modality. Abbreviations: 3-DG, 3-deoxyglucosone; CEL,  $N^{\epsilon}$ -(carboxyethyl)lysine; CML,  $N^{\epsilon}$ -(carboxymethyl)lysine; GO, glyoxal; HD, hemodialysis; MG-H1,  $N^{\delta}$ -(5-hydro-5-methyl-4-imidazol-2-yl)ornithine; MGO, methylglyoxal; PD, peritoneal dialysis; SAF, skin autofluorescence.
